# Supplementary material for: The immune vulnerability landscape of the 2019 Novel Coronavirus, SARS-CoV-2
Source: bioRxiv or medRxiv preprint supplement (doi:10.1101/2020.02.08.939553), 2020-09-04

# Sup. Fig. 1

(a)

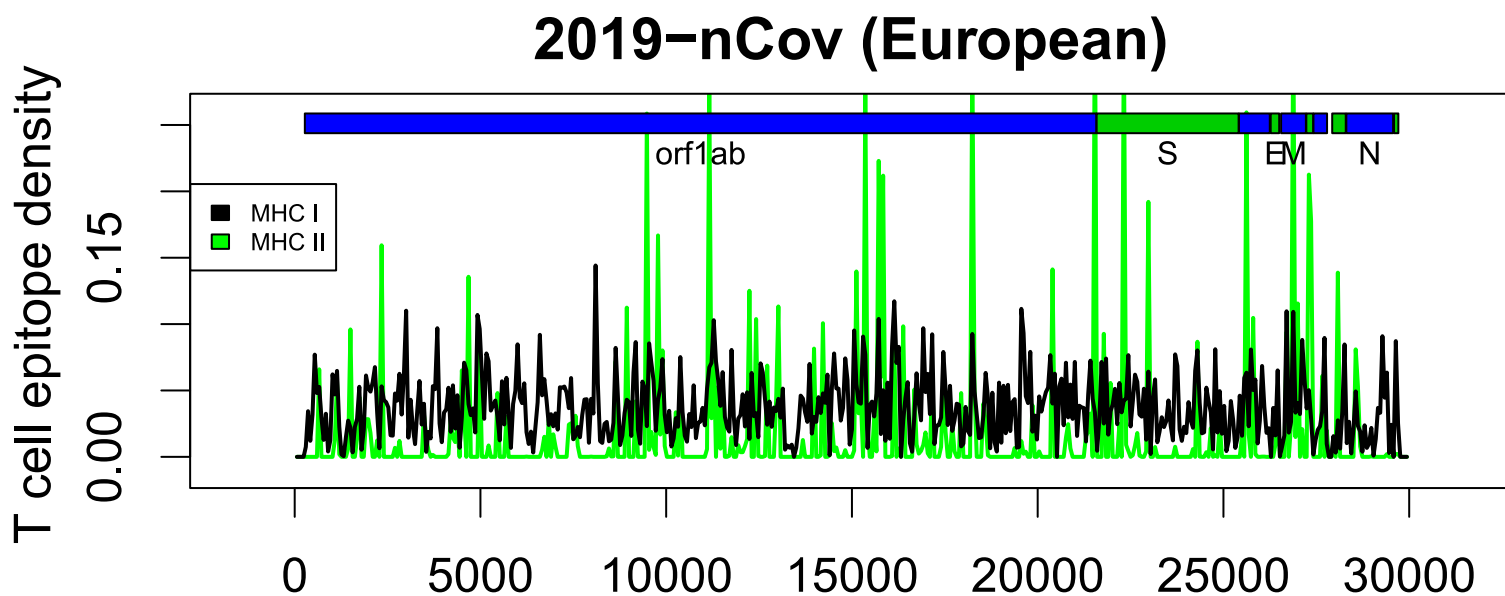

(b)

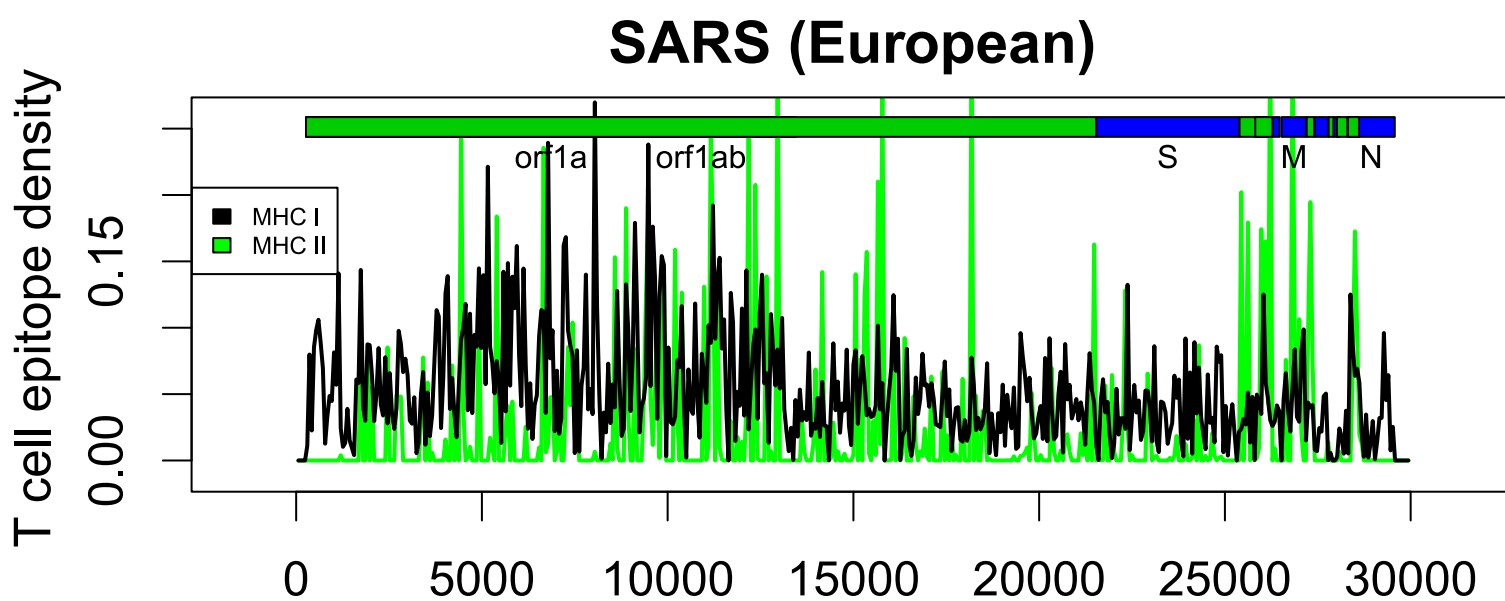

(c)

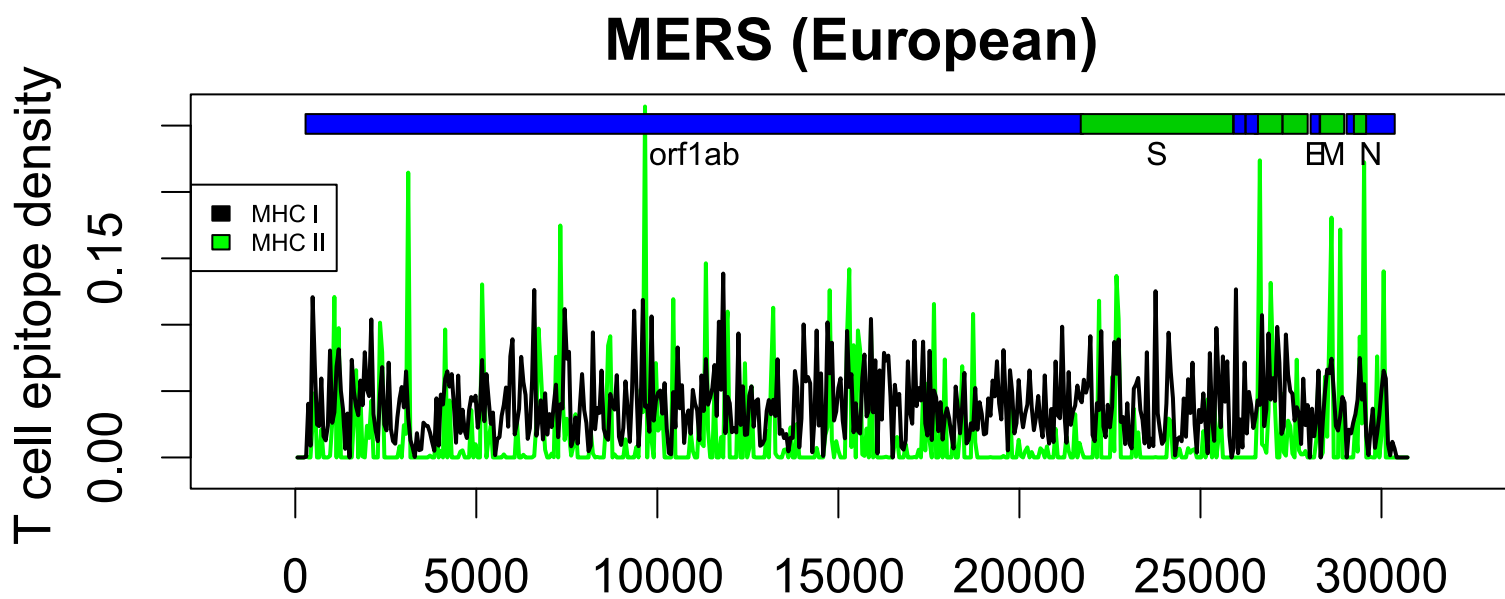

Supplement: Supplementary file [file media-1.pdf]
