# Supplementary material for: The immune vulnerability landscape of the 2019 Novel Coronavirus, SARS-CoV-2
Source: bioRxiv or medRxiv preprint supplement (doi:10.1101/2020.02.08.939553), 2020-09-04

(a)

nCov

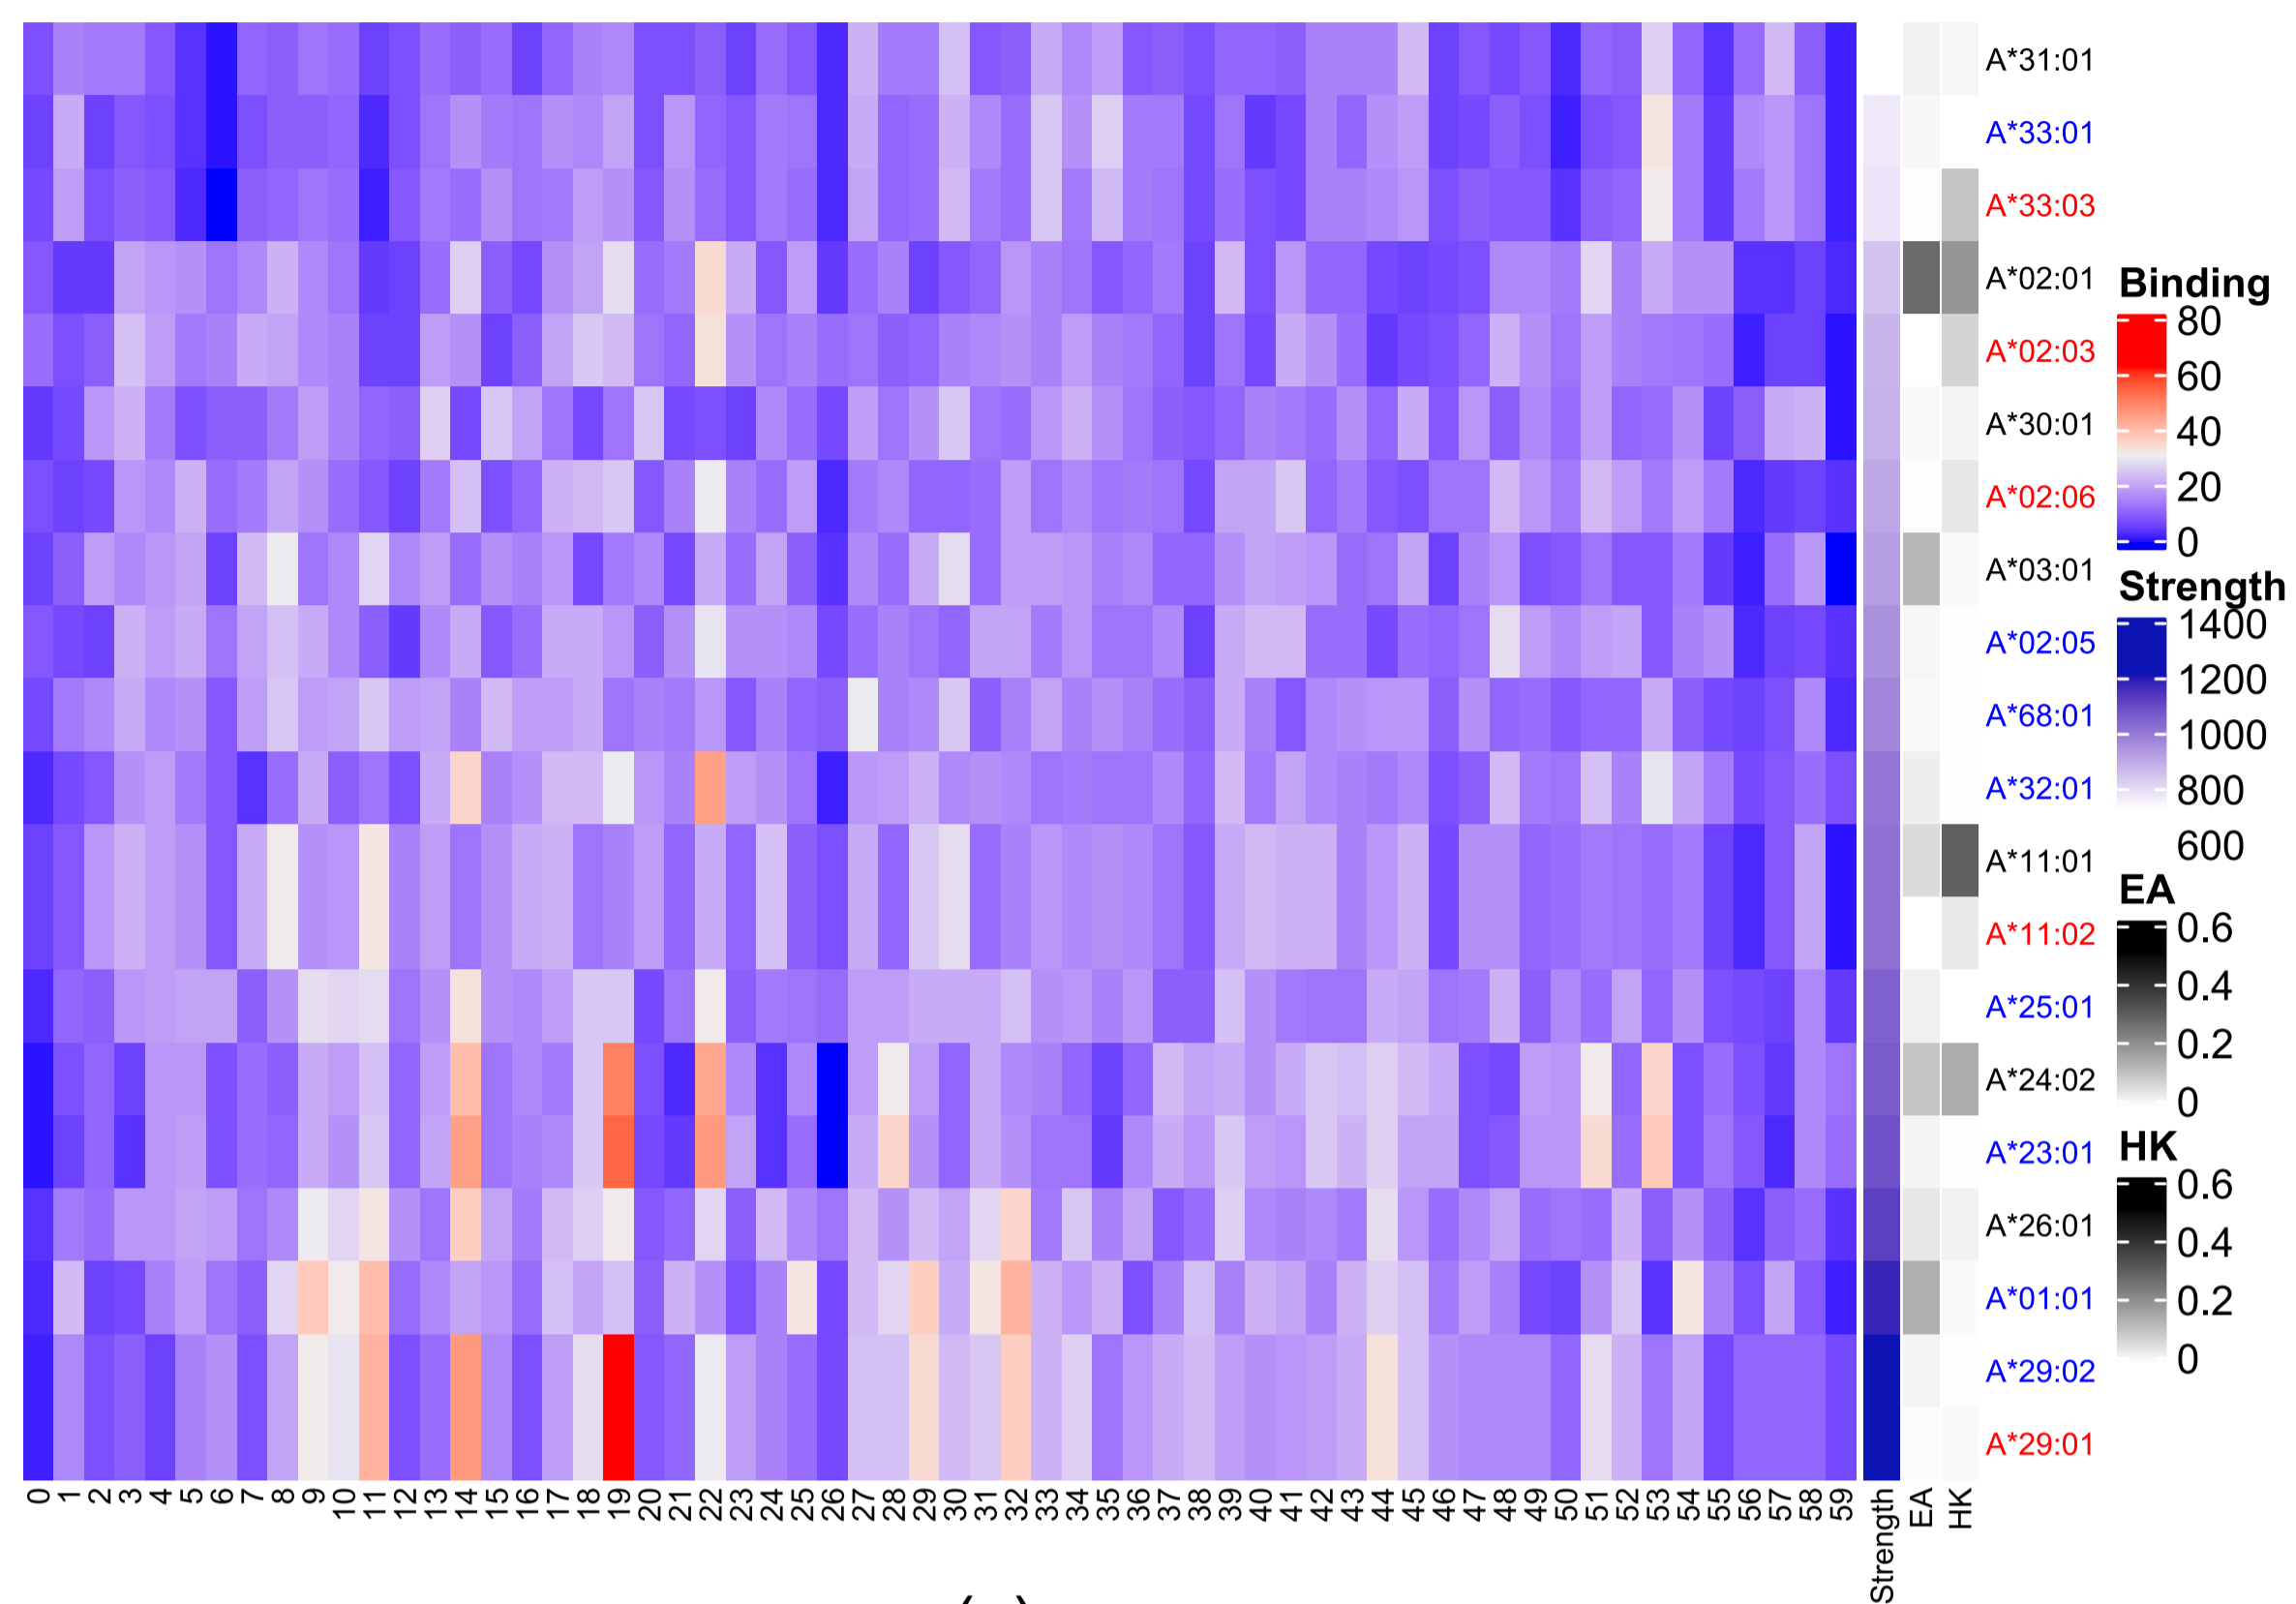

(b)

SARS

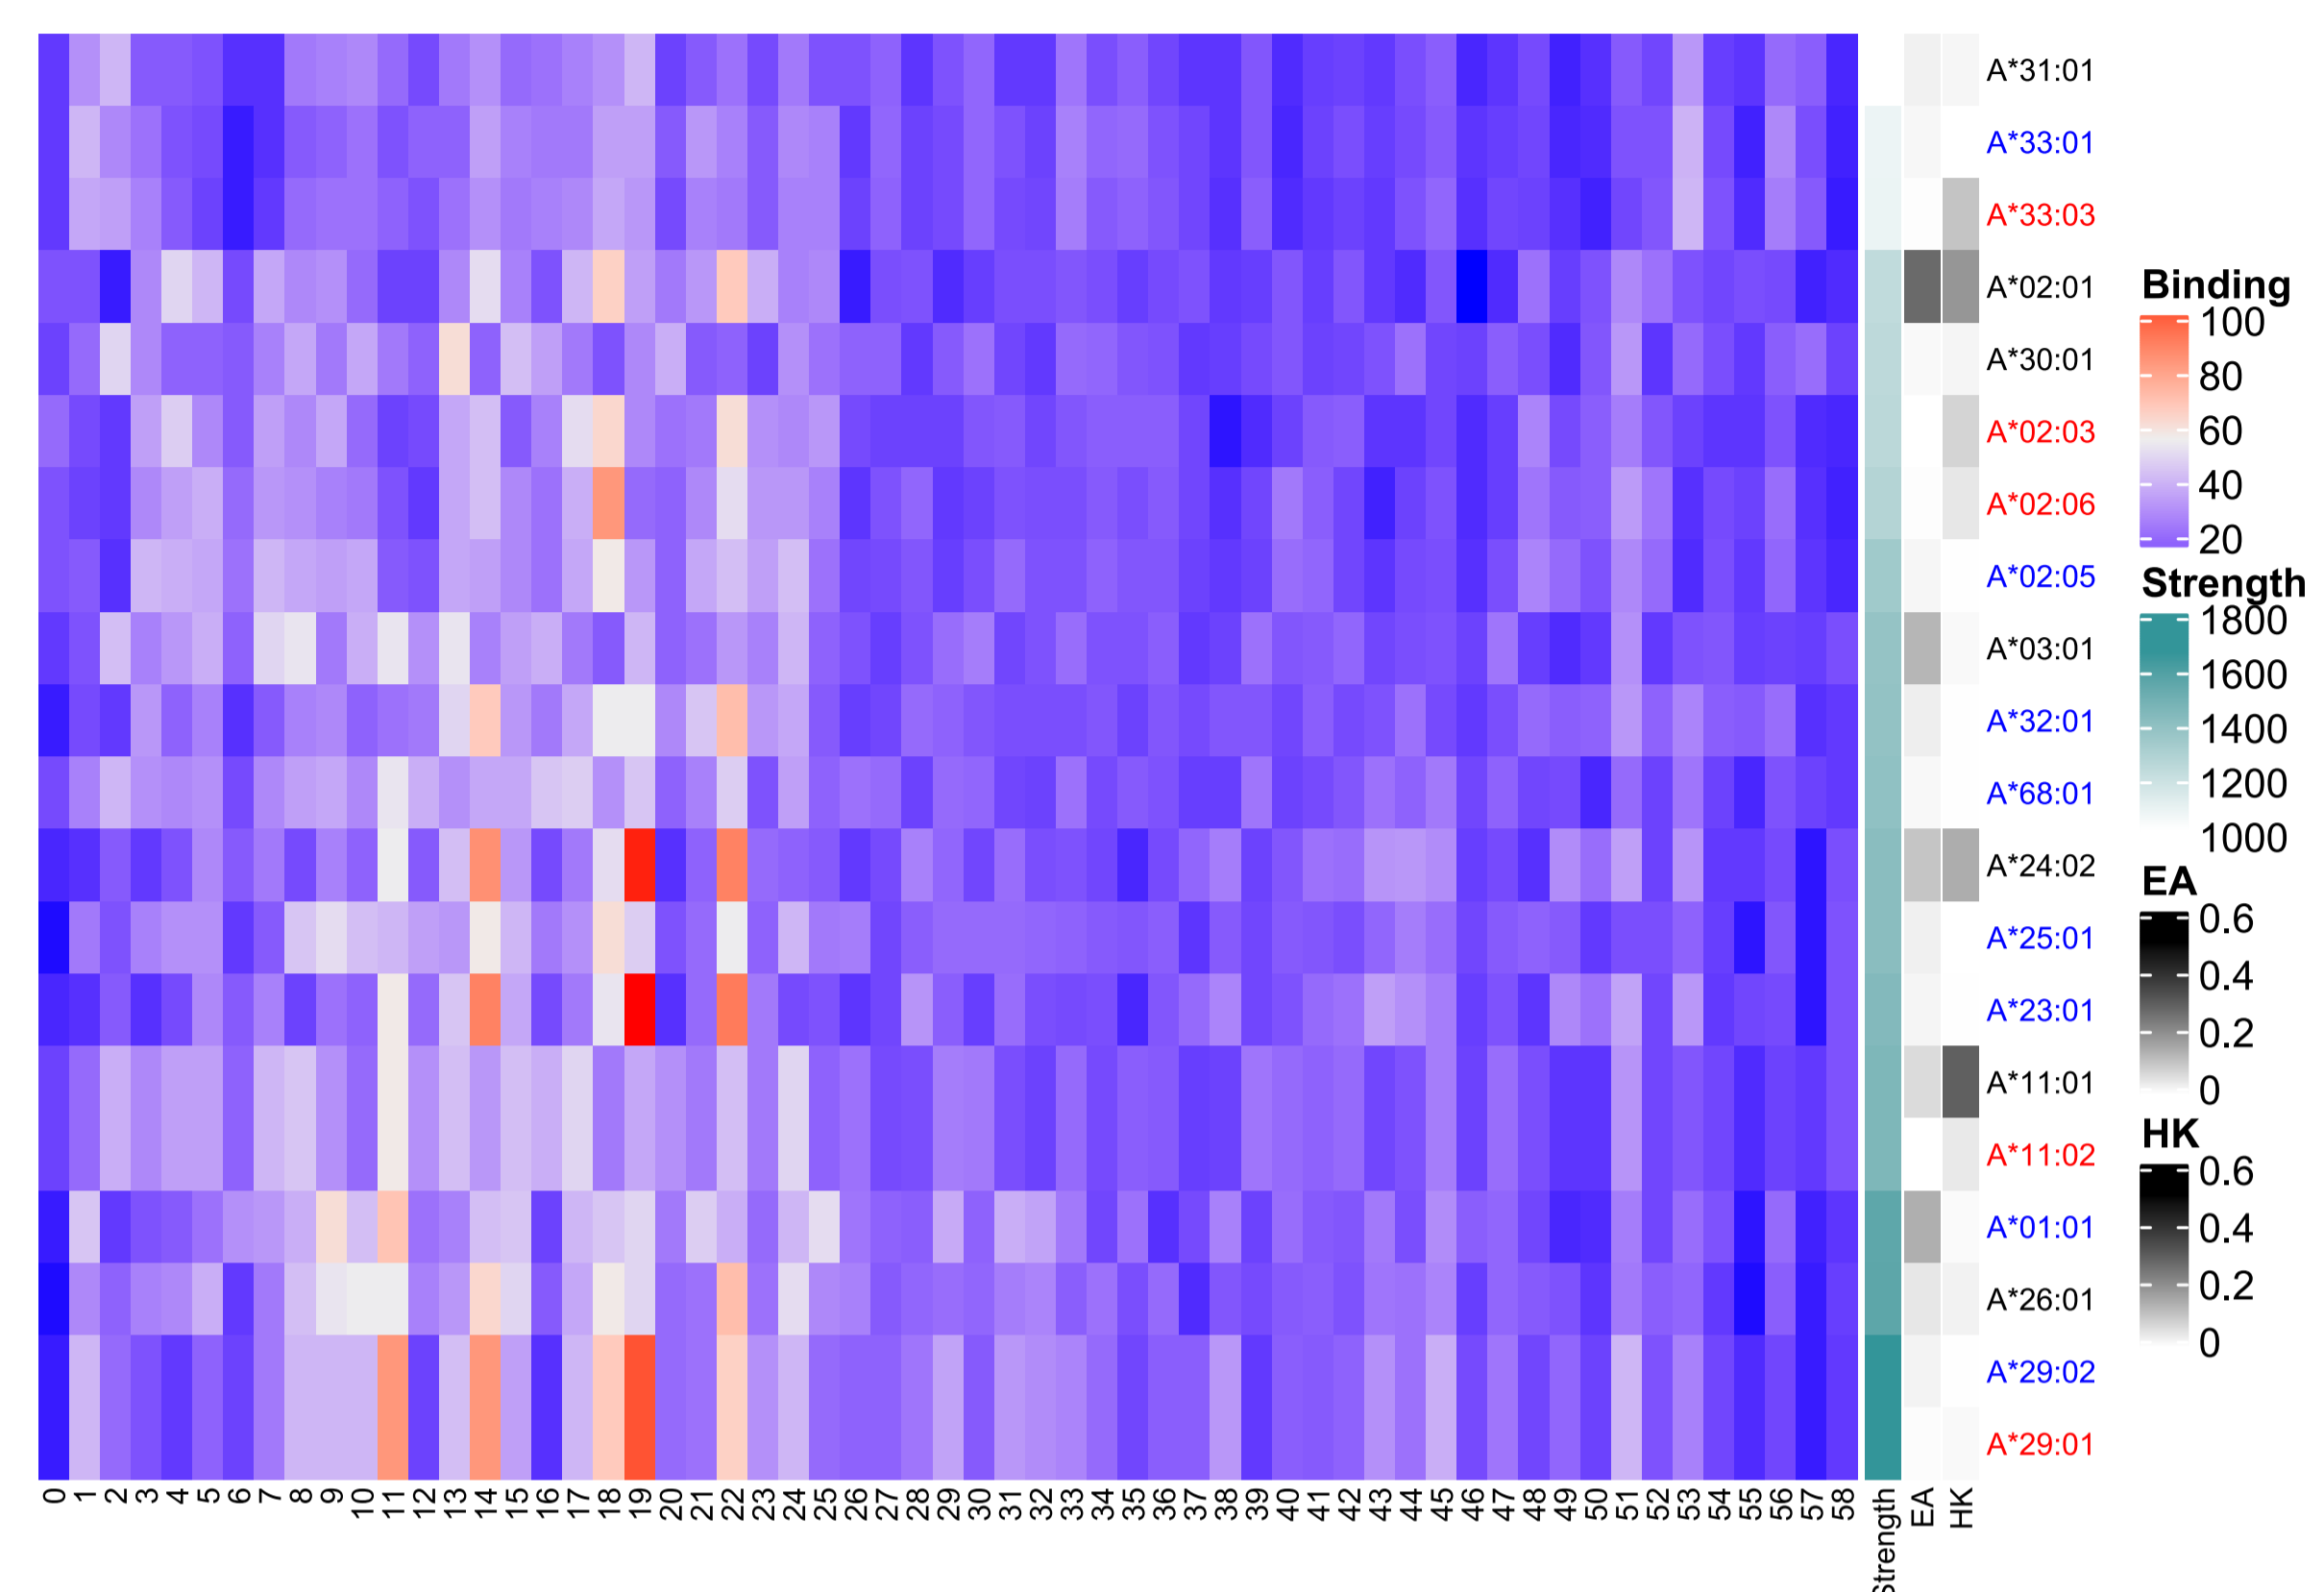

(c)

MERS

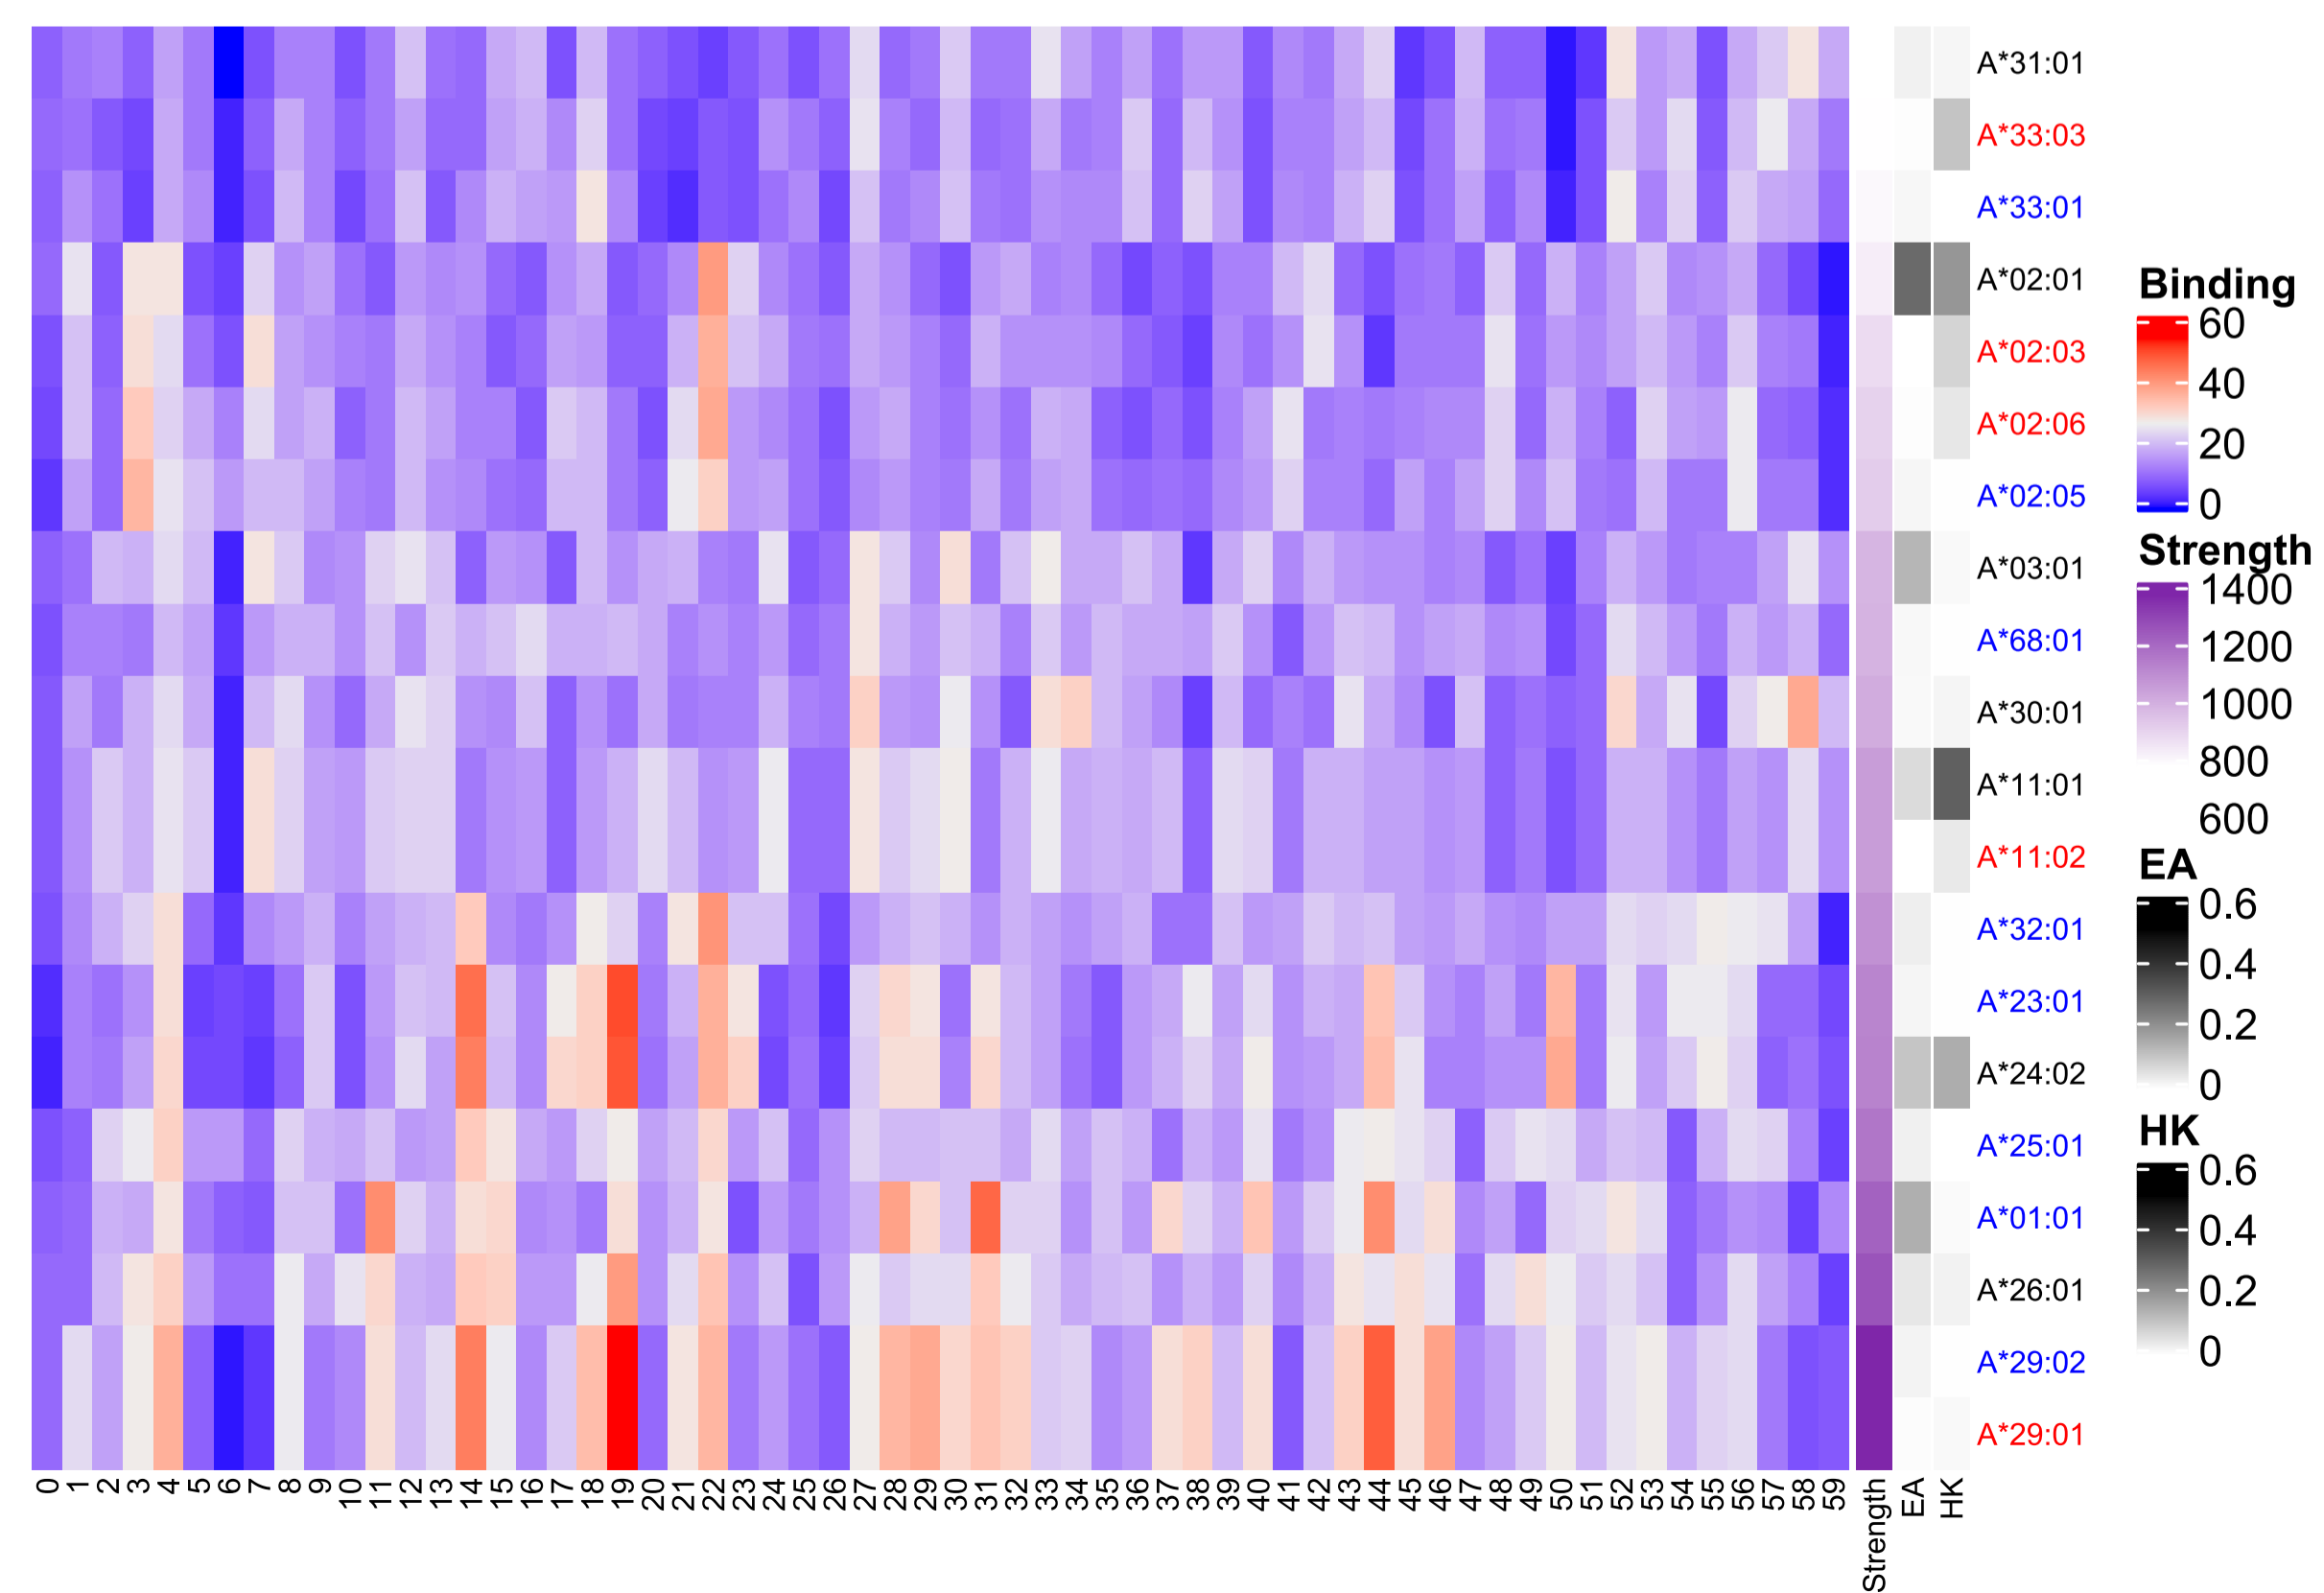

Supplement: Supplementary file [file media-2.pdf]
